# Supplementary material
Source: PubMed Central journal article supplement (PMC5641878)
Supplement: 10.1074_M117.803254_jbc.M117.803254-1.pdf [file 10.1074_M117.803254_jbc.M117.803254-1.pdf]

# Supplemental Data

The transcription factor *Gbx2* induces expression of Kruppel-like factor 4 to maintain and induce naïve pluripotency of embryonic stem cells

Manman Wang, Ling Tang, Dahai Liu, Qi-Long Ying, Shoudong Ye

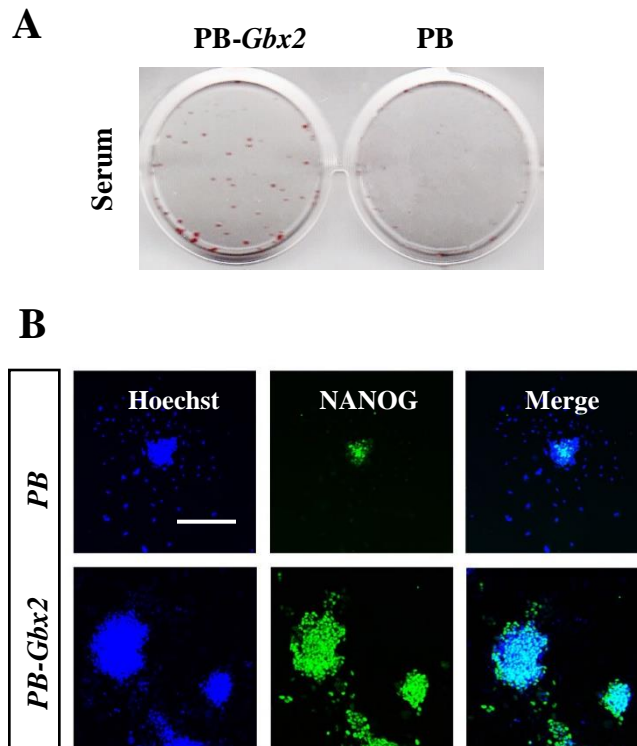

**Figure S1.** Overexpression of *Gbx2* is able to promote mESCs self-renewal.

A. AP staining of 46C mESCs overexpressing *Gbx2* cultured in the absence of LIF for 8 days.

B. Immunofluorescence staining of NANOG in 46C mESCs overexpressing PB or HA tagged *Gbx2* cultured in the absence of LIF for 8 days. Scale bar: 100  $\mu$ m.

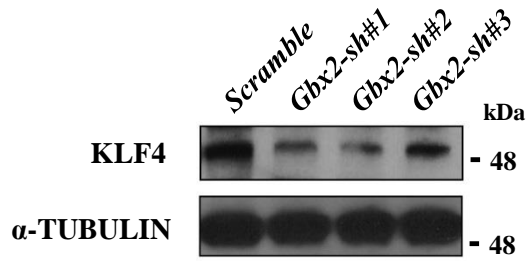

**Figure S2.** Knockdown of *Gbx2* reduced the KLF4 protein levels .

Western blot analysis of KLF4 in *scramble* and *Gbx2* knockdown 46C mESCs cultured in LIF/serum condition.  $\alpha$ -TUBULIN is used as a loading control.

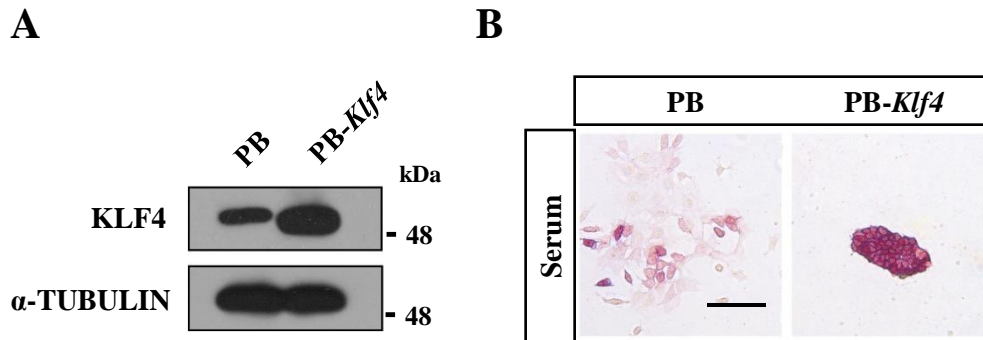

**Figure S3.** Elevated expression of *Klf4* supports 46C mESC self-renewal

A. Western blot analysis of KLF4 in PB and PB-*Klf4* transfected 46C mESCs.  $\alpha$ -TUBULIN is used as a loading control.

B. AP staining of PB and PB-*Klf4* 46C mESCs cultured in the absence of LIF for 8 days. Scale bar: 100  $\mu$ m.

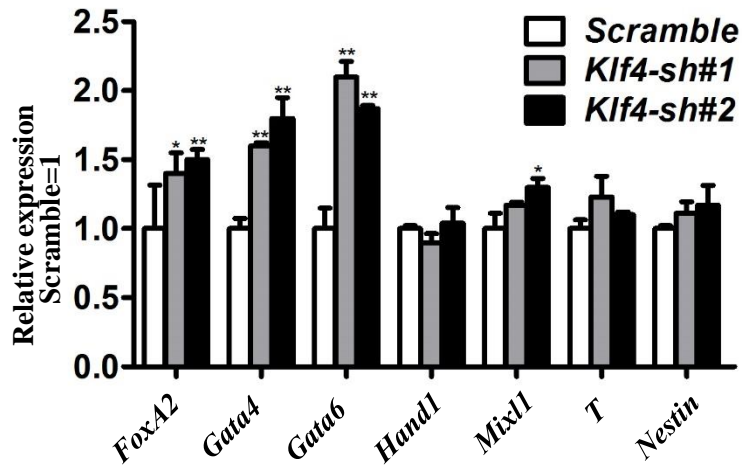

**Figure S4.** Knockdown of *Klf4* induces PB-*Gbx2* mESC differentiation.

qRT-PCR analysis of the expression levels of *FoxA2*, *Gata4*, *Gata6*, *Hand1*, *Mixl1*, *T* and *Nestin* in the PB-*Gbx2* cells, transfected with *scramble* or *Klf4* shRNA lentivirus, cultured in the absence of LIF. Data are presented as the mean  $\pm$  s.d. of three independent experiments. \*P<0.05, \*\*P<0.01 versus *scramble*.

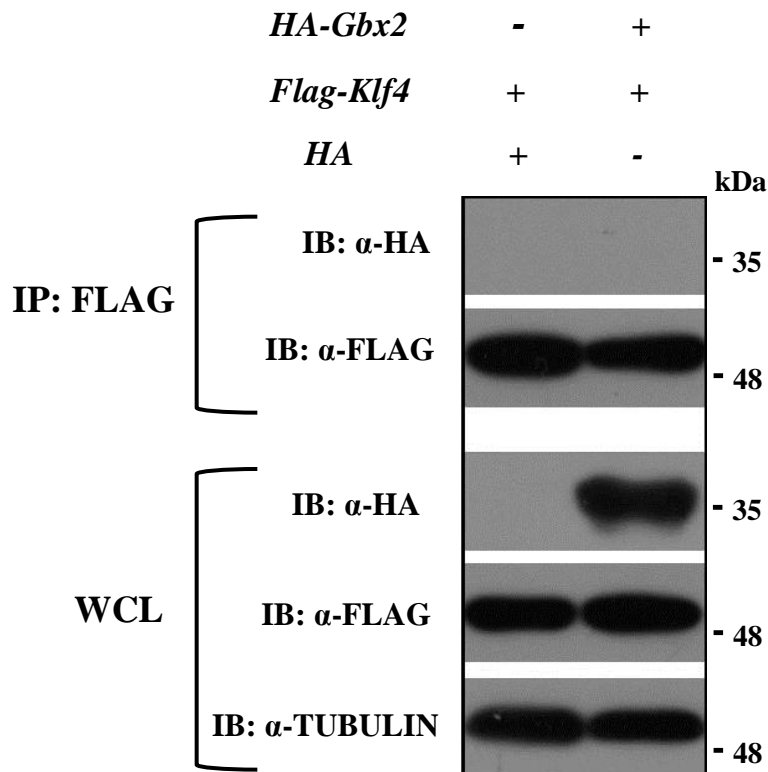

**Figure S5.** GBX2 does not interact with KLF4 during the mEpiSC reprogramming.

*Flag*-tagged *Klf4* overexpressed CD1 mEpiSCs, cultured in Activin A, bFGF and IWR1 conditions, were transfected with *HA* and *HA*-tagged *Gbx2*, respectively. Cells were then transferred into LIF/2i culture conditions for 2 days. Co-IP of transfected *HA* or *HA*-tagged *Gbx2* were performed using *Flag* tagged *Klf4*. WCL: whole cell lysate.

**Table S1.** List of shRNA sequences used for Knockdown

| <b>Symbol</b>    | <b>shRNA Sequence (5'-3')</b> |
|------------------|-------------------------------|
| <i>Gbx2-sh#1</i> | GCAAGGGAAAGACGAGTCAAA         |
| <i>Gbx2-sh#2</i> | GAGAGCGATGTGGATTACA           |
| <i>Gbx2-sh#3</i> | GCCTGGTCAGACTGCTCATAA         |
| <i>Klf4-sh#1</i> | GCGCTACAATCATGGTCAAGT         |
| <i>Klf4-sh#2</i> | GTCAGCTTGTGAATGGATAAT         |

**Table S2.** List of primers used for qRT-PCR analysis

| <b>Symbol</b> | <b>Forward sequence (5'-3')</b> | <b>Reverse sequence (5'-3')</b> |
|---------------|---------------------------------|---------------------------------|
| <i>Gbx2</i>   | F:GCAAGGGAAAGACGAGAA            | R:GCCGGGGTCTTCTTCCTTAT          |
| <i>Klf4</i>   | F: GAAGACCAGGATTCCCTTGA         | R: CCAAGCACCATCATTTAGGC         |
| <i>Nanog</i>  | F: TACCTCAGCCTCCAGCAGA          | R: CCTCCAAGTCACTGGCAG           |
| <i>Tbx3</i>   | F: AGGAGCGTGTCTGTCAGGTT         | R: GCCATTACCTCCCAATTTT          |
| <i>Rex1</i>   | F: TCACTGTGCTGCCTCCAAGT         | R: GGGCACTGATCCGCAAAC           |
| <i>Stella</i> | F: TTCCGAGCTAGCTTTTGAGG         | R: ACACCGGGGTTTAGGGTTAG         |
| <i>Fgf5</i>   | F: GCAGCCCACGGGTCAA             | R: CGGTTGCTCGGACTGCTT           |
| <i>Klf2</i>   | F: AGGCCTGTGGGTTTCGCTATAAA      | R: GGCAAATTATGGCTCAAAGTAGCAG    |
| <i>FoxA2</i>  | F:CCTCAAGGGAGCAGTCTCAC          | R:TTTCTCCTGGTCCGGTACAC          |
| <i>Gata6</i>  | F:GAGCTGGTGC TACCAAGAGG         | R:TGCAAAAGCC CATCTCTTCT         |
| <i>Gata4</i>  | F:TCTCACTATG GGCACAGCAG         | R:GCGATGTCTG AGTGACAGGA         |
| <i>Hand1</i>  | F: CGCCTGGCTACCAGTTACAT         | R: GGCCTGGTCTCACTGGTTTA         |
| <i>Mixl1</i>  | F:GGAGCTGATC TCCTGACTGG         | R:TGAGTCAAGC CGAAGGTTCT         |
| <i>T</i>      | F: CCGGTGCTGAAGGTAAATT          | R: CTCCATTGAGCTTGTGGT           |
| <i>Nestin</i> | F:CTCGAGCAGG AAGTGGTAGG         | R:TTGGGACCAG GGACTGTTAG         |

**Table S3.** List of ChIP-qRT-PCR primers for assay different promoter regions of *Klf4*.

| <b>Location<br/>From UCSC</b> | <b>Forward sequence<br/>(5'-3')</b> | <b>Reverse sequence<br/>(5'-3')</b> |
|-------------------------------|-------------------------------------|-------------------------------------|
| -4100~-3791                   | F:CCGTGAACACATGCATGCCTG             | R:TTCCAGCCACTCACTTAGGACCTGC         |
| -3789~-3592                   | F:ACGCTACAGGGGATAAAGTGATG           | R:GAACTCACTTTGCCCGTTTTCTC           |

**Table S4.** The PCR primer sequences for amplifying the different promoter regions of *Klf4* to construct *Klf4* promoter-luciferase reporter.

| <b>Location<br/>From UCSC</b> | <b>Primer sequence for PCR<br/>(5'-3')</b> |
|-------------------------------|--------------------------------------------|
| -4100~-3701                   | F:GGGGTACCCTAAATCAAGGTAGCCAGGACAG          |
|                               | R:CCCAAGCTTTCAGGACTTAATAGGTTTTAATATC       |
